# Supplementary material for: Controlling the unpaired electron by electrostatic attraction in the solid state
Source: Royal Society of Chemistry journal article supplement (doi:10.1039/d1cc05244f), 2021-01-01
Supplement: d1cc05244f1.pdf [file d1cc05244f1.pdf]

## **Electronic Supplementary Information**

for

### **Controlling the unpaired electron by electrostatic attraction in the solid state**

Haiyan Cui\*, Liting Wang, Huapeng Ruan, Min Liu, Zhongtao Feng, Jie Wang, Yue Zhao, and Xinping Wang\*

\*Corresponding author. Email: haiyancui555@163.com; xpwang@nju.edu.cn

## Table of Contents

|                                                                                                                                                                                   |            |
|-----------------------------------------------------------------------------------------------------------------------------------------------------------------------------------|------------|
| 1. Materials and General.....                                                                                                                                                     | S3         |
| 2. Synthesis.....                                                                                                                                                                 | S3         |
| 3. Reciprocal transformation .....                                                                                                                                                | S4         |
| 4. Crystal structures .....                                                                                                                                                       | S5         |
| Table S1 Crystal data and structure refinement.....                                                                                                                               | S5         |
| Fig. S1 Thermal ellipsoid drawing of the molecular structure of <b>1K(cryp)</b> .....                                                                                             | S6         |
| Fig. S2 Thermal ellipsoid drawing of the molecular structures of <b>1K(18c6)</b> .....                                                                                            | S6         |
| Fig. S3 Thermal ellipsoid drawing of the molecular structures of $(1_4K_2)^{2-}$ dianion in $[1K(15c5)]_4$ .....                                                                  | S7         |
| Fig. S4 Thermal ellipsoid drawing of the molecular structures of one unit in $(1K)_{2n}$ .....                                                                                    | S8         |
| <b>5. EPR and SQUID measurements</b> .....                                                                                                                                        | <b>S9</b>  |
| Fig. S5 Experimental and simulated EPR spectra of <b>1K(cryp)</b> in THF solution.....                                                                                            | S9         |
| Fig. S6 Experimental and simulated EPR spectra of <b>1K(18c6)</b> in THF solution.....                                                                                            | S9         |
| Fig. S7 EPR spectrum of $[1K(15c5)]_4$ in power .....                                                                                                                             | S10        |
| <b>Fig. S8 EPR spectrum of <math>(1K)_{2n}</math> in powder at room temperature with simulation</b> .....                                                                         | <b>S10</b> |
| Fig. S9 EPR spectrum of $[1K(15c5)]_4$ in THF solution at room temperature. ....                                                                                                  | S11        |
| <b>Fig. S10 EPR spectrum of <math>(1K)_{2n}</math> in THF solution at room temperature.</b> ....                                                                                  | <b>S11</b> |
| <b>Fig. S11 SQUID measurement of <math>(1K)_{2n}</math> in powder.</b> .....                                                                                                      | <b>S12</b> |
| 6. UV Spectra.....                                                                                                                                                                | S12        |
| <b>Fig. S12 UV-vis spectra of <b>1K(cryp)</b> and <b>1K(18c6)</b> in THF solution at room temperature.</b> ....                                                                   | <b>S12</b> |
| <b>Fig. S13 UV-vis spectra of <math>[1K(15c5)]_4</math> in THF solution at room temperature.</b> ....                                                                             | <b>S13</b> |
| <b>Fig. S14 UV-vis spectra of <math>(1K)_{2n}</math> in THF solution at room temperature.</b> .....                                                                               | <b>S13</b> |
| 7. Computation details .....                                                                                                                                                      | S14        |
| Table S2 Comparison of selected experimental and calculated bond lengths for $1^{\bullet-}$ in <b>1K(cryp)</b> .S14                                                               | S14        |
| Table S3 Comparison of selected experimental and calculated bond lengths for <b>1K(18c6)</b> .....                                                                                | S15        |
| Table S4 Calculated excited wavelengths ( $\lambda$ ) and oscillator strengths ( $f$ ) of selected transitions of $1^{\bullet-}$ (in <b>1K(cryp)</b> ) and <b>1K(18c6)</b> . .... | S15        |
| <b>Fig. S15 Calculated UV/vis absorption spectra of <math>1^{\bullet-}</math>.</b> ....                                                                                           | <b>S16</b> |
| <b>Fig. S16 Calculated UV/vis absorption spectra of <b>1K(18c6)</b>.</b> ....                                                                                                     | <b>S16</b> |
| Table S5 Main frontier molecular orbitals related to UV/vis absorption transitions of $1^{\bullet-}$ and <b>1K(18c6)</b> .....                                                    | S17        |
| References.....                                                                                                                                                                   | S22        |

## 1. Materials and General

All operations were carried out under an atmosphere of dry argon or nitrogen by using modified Schlenk line and glovebox techniques. All solvents were freshly distilled from Na/benzophenone and degassed prior to use. Elemental analyses were performed on an Elementar Vario EL III instrument at Shanghai Institute of Organic Chemistry, the Chinese Academy of Sciences. EPR spectra were obtained using Bruker plus-6/1 X-band variable-temperature apparatus. Commercially available reagents were purchased from Aldrich, Acros or Alfa-Assar, and used as received. Compound 2,7-*t*Bu<sub>2</sub>-PTO (**1**) was synthesized according to the reported literatures.<sup>1</sup>

### Procedure for X-ray diffraction measurement

In glove box under N<sub>2</sub> atmosphere, the crystal sample of **1K(cryp)** or **1K(18c6)** was coated with polybutylene. This sample was stable for several weeks in the glove box and suitable for X-ray diffraction measurements. The crystals were each mounted on a glass capillary in perfluorinated oil and measured in a cold N<sub>2</sub> flow. The data were collected on a Bruker APEX-II CCD area detector with a radiation source of Ga(K $\alpha$ ) (1.34139 Å) or Mo(K $\alpha$ ) (0.71073 Å) at setting temperatures. Multiscan or empirical absorption corrections (SADABS) were applied. The structures were solved by direct methods and all refined on  $F^2$  with the SHELX-2018/3 software package.<sup>2</sup> The positions of the H atoms were calculated and considered isotropically according to a riding model.

### Procedure for EPR measurement

In glove box under N<sub>2</sub> atmosphere, the crystal sample of **1K(cryp)** or **1K(18c6)** was dissolved in THF and loaded into sealed paramagnetic tube for EPR measurements.

### Procedure for UV/Vis spectral measurement

All the sample solutions were prepared in glove box. The crystal sample of **1K(cryp)** or **1K(18c6)** was dissolved in THF. The prepared sample solution was injected into a sealed cuvette, the absorption was recorded at room temperature.

## 2. Synthesis

### Synthesis of **1K(cryp)**

A mixture of **1** (58.3 mg, 0.16 mmol), K (6.6 mg, 0.17 mmol) and cryptand[2.2.2] (64.1 mg, 0.17 mmol) in THF ( $\approx$  20 ml) was stirred at room temperature overnight, whereupon the color of the solution was changed from yellow to brown green. After filtration, the filtrate was concentrated to ca. 2 ml and stored at -20 °C for 1 day to afford black crystals of **1K(cryp)** (48.5 mg, 39.4%). M.p. 186-189 °C. Elemental analysis (%) Calcd for C<sub>42</sub>H<sub>58</sub>KN<sub>2</sub>O<sub>10</sub>•C<sub>4</sub>H<sub>10</sub>O<sub>2</sub>: C, 62.77; H, 7.79; N, 3.18. Found: C, 62.59; H, 7.55; N, 3.55.

### Synthesis of **1K(18c6)**

A mixture of **1** (98.5 mg, 0.26 mmol), **K** (11.1 mg, 0.28 mmol) and 18-c-6 (69.5 mg, 0.26 mmol) in THF ( $\approx$  30 ml) was stirred at room temperature overnight, whereupon the color of the solution was changed from yellow to green. After filtration, the filtrate was concentrated to ca. 5 ml and stored at 5 °C for 1 day to afford green crystals of **1K(18c6)** (77.1 mg, 43.2%). M.p. 184-186 °C. Elemental analysis (%) Calcd for  $C_{36}H_{46}KO_{10} \cdot C_4H_8O$ : C, 63.79; H, 6.84. Found: C, 63.23; H, 6.98.

### Synthesis of **[1K(15c5)]<sub>4</sub>**

A mixture of **1** (81.5 mg, 0.22 mmol), **K** (9.0 mg, 0.23 mmol) and 15-c-5 (71.2 mg, 0.32 mmol) in DME ( $\approx$  30 ml) was stirred at room temperature overnight, whereupon the color of the solution was changed from yellow to dark green. After filtration, the filtrate was concentrated to ca. 5 mL and stored at 5 °C for 2 day to afford dark red solid of **[1K(15c5)]<sub>4</sub>** (25.6 mg, 17.4%). M.p. 163-165 °C. Elemental analysis (%) Calcd for  $C_{136}H_{168}K_4O_{36}$ : C, 64.43; H, 6.68; Found: C, 64.91; H, 7.32.

### Synthesis of **(1K)<sub>2n</sub>**

A mixture of **1** (63.2 mg, 0.17 mmol), **K** (8.2 mg, 0.21 mmol) in DME ( $\approx$  30 ml) was stirred at room temperature overnight, whereupon the color of the solution was changed from yellow to green. After filtration, the filtrate was concentrated to ca. 5 mL and stored at 5 °C for 1 day to afford black crystals of **(1K)<sub>2n</sub>** (20.3 mg, 23.8%). M.p. >300 °C. Elemental analysis (%) Calcd for  $C_{28}H_{32}KO_6$ : C, 66.77; H, 6.40. Found: C, 65.89; H, 7.63.

## 3. Reciprocal transformation

### From **1K(cryp)** to **1K(18c6)**

A mixture of **1** (60.1 mg, 0.16 mmol), **K** (6.6 mg, 0.17 mmol) and cryptand[2.2.2] (63.6 mg, 0.17 mmol) in THF ( $\approx$  30 ml) was stirred at room temperature overnight, whereupon the color of the solution was changed from yellow to brown green. After filtration, KI (36.3 mg, 0.22 mmol) and 18-c-6 (45.3 mg, 0.17 mmol) were added into the filtrate. The color soon changed to from brown green to green. The mixture was allowed to stir overnight and then concentrated to ca. 3 ml and stored at -20 °C for 1 day to afford green crystals of **1K(18c6)**. Cell parameters:  $a = 8.03 \text{ \AA}$ ,  $b = 22.37 \text{ \AA}$ ,  $c = 24.55 \text{ \AA}$ ,  $V = 4408 \text{ \AA}^3$ , Orthorhombic P.

### From **1K(18c6)** to **1K(cryp)**

A mixture of **1** (64.8 mg, 0.17 mmol), **K** (7.1 mg, 0.18 mmol) and 18-c-6 (48.0 mg, 0.18 mmol) in THF ( $\approx$  30 ml) was stirred at room temperature overnight, whereupon the color of the solution was changed from yellow to green. After filtration, cryptand[2.2.2] (68.4 mg, 0.18 mmol) was added into the filtrate. The color changed to from green to brown green 5 min later. The mixture was allowed to stir overnight and then concentrated to ca. 3 mL and stored at -20 °C for 1 day to afford black crystals of **1K(cryp)**. Cell parameters:  $a = 13.01 \text{ \AA}$ ,  $b = 16.42 \text{ \AA}$ ,  $c = 20.60 \text{ \AA}$ ,  $\beta = 98.77^\circ$ ,  $V = 4349 \text{ \AA}^3$ , Monoclinic C.

## 4. Crystal structures

**Table S1.** Crystal data and structure refinement. Crystals of **1K(cryp)** and **1K(18c6)** suitable for X-ray analysis were grown from THF. And crystals of **[1K(15c5)]<sub>4</sub>** and **(1K)<sub>2n</sub>** suitable for X-ray analysis were grown from DME. Two seriously disordered solvent molecules (THF) in **1K(18c6)** have been squeezed.

|                                             | <b>1K(cryp)</b>                                                 | <b>1K(18c6)</b>                                  | <b>[1K(15c5)]<sub>4</sub></b>                                    | <b>(1K)<sub>2n</sub></b>                        |
|---------------------------------------------|-----------------------------------------------------------------|--------------------------------------------------|------------------------------------------------------------------|-------------------------------------------------|
| CCDC No.                                    | 2061470                                                         | 2061471                                          | 2061472                                                          | 2061473                                         |
| Formula                                     | C <sub>42</sub> H <sub>58</sub> KN <sub>2</sub> O <sub>10</sub> | C <sub>36</sub> H <sub>46</sub> KO <sub>10</sub> | C <sub>144</sub> H <sub>188</sub> K <sub>4</sub> O <sub>40</sub> | C <sub>28</sub> H <sub>32</sub> KO <sub>6</sub> |
| Formula weight                              | 790.00                                                          | 677.83                                           | 2715.33                                                          | 503.63                                          |
| Temp. (K)                                   | 193(2) K                                                        | 296(2)                                           | 296(2)                                                           | 193(2) K                                        |
| Crystal system                              | Monoclinic                                                      | Orthorhombic                                     | Triclinic                                                        | Triclinic                                       |
| Space group                                 | <i>C2/c</i>                                                     | <i>P2<sub>1</sub>2<sub>1</sub>2<sub>1</sub></i>  | <i>P-1</i>                                                       | <i>P-1</i>                                      |
| <i>a</i> (Å)                                | 12.8968(4)                                                      | 8.0229(5)                                        | 15.9555(13)                                                      | 11.7079(6)                                      |
| <i>b</i> (Å)                                | 16.1529(6)                                                      | 22.4041(14)                                      | 17.9505(14)                                                      | 11.8131(6)                                      |
| <i>c</i> (Å)                                | 20.4741(8)                                                      | 24.5984(16)                                      | 27.485(2)                                                        | 12.0431(10)                                     |
| $\alpha$ (°)                                | 90                                                              | 90                                               | 88.330(2)                                                        | 109.702(4)                                      |
| $\beta$ (°)                                 | 98.9680(10)                                                     | 90                                               | 74.113(2)                                                        | 98.730(3)                                       |
| $\gamma$ (°)                                | 90                                                              | 90                                               | 86.647(3)                                                        | 119.522(2)                                      |
| <i>V</i> [Å <sup>3</sup> ]                  | 4213.0(3)                                                       | 4421.5(5)                                        | 7557.7(11)                                                       | 1257.61(14)                                     |
| <i>Z</i>                                    | 4                                                               | 4                                                | 2                                                                | 2                                               |
| $\rho_{\text{calcd}}$ (g·cm <sup>-3</sup> ) | 1.245                                                           | 1.018                                            | 1.193                                                            | 1.330                                           |
| $\mu$ (mm <sup>-1</sup> )                   | 0.184                                                           | 0.164                                            | 0.192                                                            | 1.452                                           |
| <i>F</i> (000)                              | 1692                                                            | 1444                                             | 2896.0                                                           | 534                                             |
| Collected data                              | 18968                                                           | 33362                                            | 65907                                                            | 4067                                            |
| Unique data                                 | 4831                                                            | 7772                                             | 34259                                                            | 4067                                            |
|                                             | [ <i>R</i> (int) = 0.0516]                                      | [ <i>R</i> (int) = 0.0490]                       | [ <i>R</i> (int) = 0.0369]                                       | [ <i>R</i> (int) = 0]                           |
| GOF on <i>F</i> <sup>2</sup>                | 0.872                                                           | 1.025                                            | 0.943                                                            | 1.165                                           |
| Final <i>R</i> indexes                      | <i>R</i> <sub>1</sub> = 0.0528                                  | <i>R</i> <sub>1</sub> = 0.0551                   | <i>R</i> <sub>1</sub> = 0.0828                                   | <i>R</i> <sub>1</sub> = 0.0967                  |
| [ <i>I</i> > 2σ( <i>I</i> )]                | $\omega R_2$ = 0.1449                                           | $\omega R_2$ = 0.1542                            | $\omega R_2$ = 0.1973                                            | $\omega R_2$ = 0.2112                           |
| <i>R</i> indexes (all data)                 | <i>R</i> <sub>1</sub> = 0.0643                                  | <i>R</i> <sub>1</sub> = 0.0664                   | <i>R</i> <sub>1</sub> = 0.1421                                   | <i>R</i> <sub>1</sub> = 0.1373                  |
|                                             | $\omega R_2$ = 0.1571                                           | $\omega R_2$ = 0.1649                            | $\omega R_2$ = 0.2325                                            | $\omega R_2$ = 0.2297                           |
| Completeness                                | 0.996                                                           | 0.995                                            | 0.984                                                            | 0.980                                           |

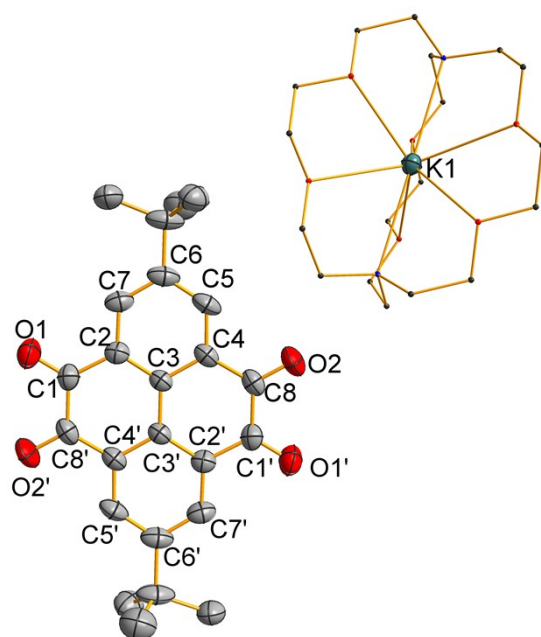

**Fig. S1** Thermal ellipsoid drawing of the molecular structure of **1K(cryp)** at 50% probability. Hydrogen atoms and K-cryptand cation are omitted for clarity. Selected bond lengths (Å) and angles (°): O1–C1 1.238(3), O2–C8 1.229(3), C1–C2 1.469(3), C1–C8' 1.490(3), C3–C3' 1.443(3), C2–C7 1.395(3), C2–C3 1.410(3), C3–C4 1.411(3), C4–C5 1.395(3), C4–C8 1.470(3), C5–C6 1.396(4), C6–C7 1.384(3); O1–C1–C2 121.9(2), O1–C1–C8' 119.9(2), O2–C8–C4 121.7(2), O2–C8–C1' 119.8(2).

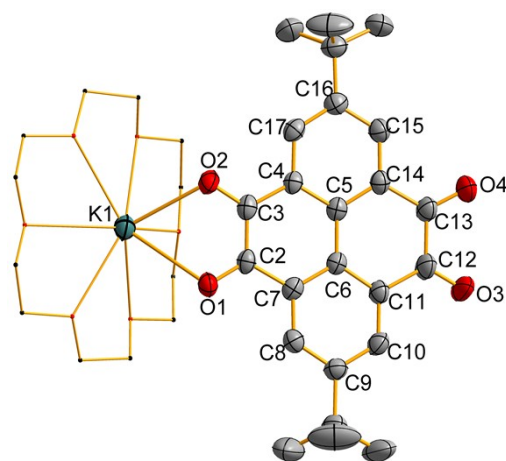

**Fig. S2** Thermal ellipsoid drawing of the molecular structures of **1K(18c6)** at 50% probability. Hydrogen atoms are omitted for clarity. Selected bond lengths (Å) and angles (°): C2–O1 1.253(5), C3–O2 1.263(5), C12–O3 1.202(5), C13–O4 1.218(5), C2–C3 1.458(6), C2–C7 1.478(5), C3–C4 1.459(5), C4–C5 1.406(5), C5–C6 1.455(5), C6–C7 1.414(5), C4–C17 1.410(5), C5–C14 1.406(5), C6–C11 1.408(5), C7–C8 1.409(5), C8–C9 1.388(6), C9–C10 1.388(6), C10–C11 1.386(6), C11–C12 1.491(6), C12–C13 1.534(6), C13–C14 1.474(5), C14–C15 1.392(6), C15–C16 1.394(6), C16–C17 1.381(6), K1–O1 2.847(3), K1–O2 2.668(3); O1–C2–C3 121.6(3), O1–C2–C7 120.7(3), C3–C2–C7 117.8(3), O2–C3–C2 120.6(3), O2–C3–C4 120.4(4), O3–C12–C11 123.2(4), O3–C12–C13 118.7(4), O4–C13–C14 123.6(4), O4–C13–C12 117.8(4).

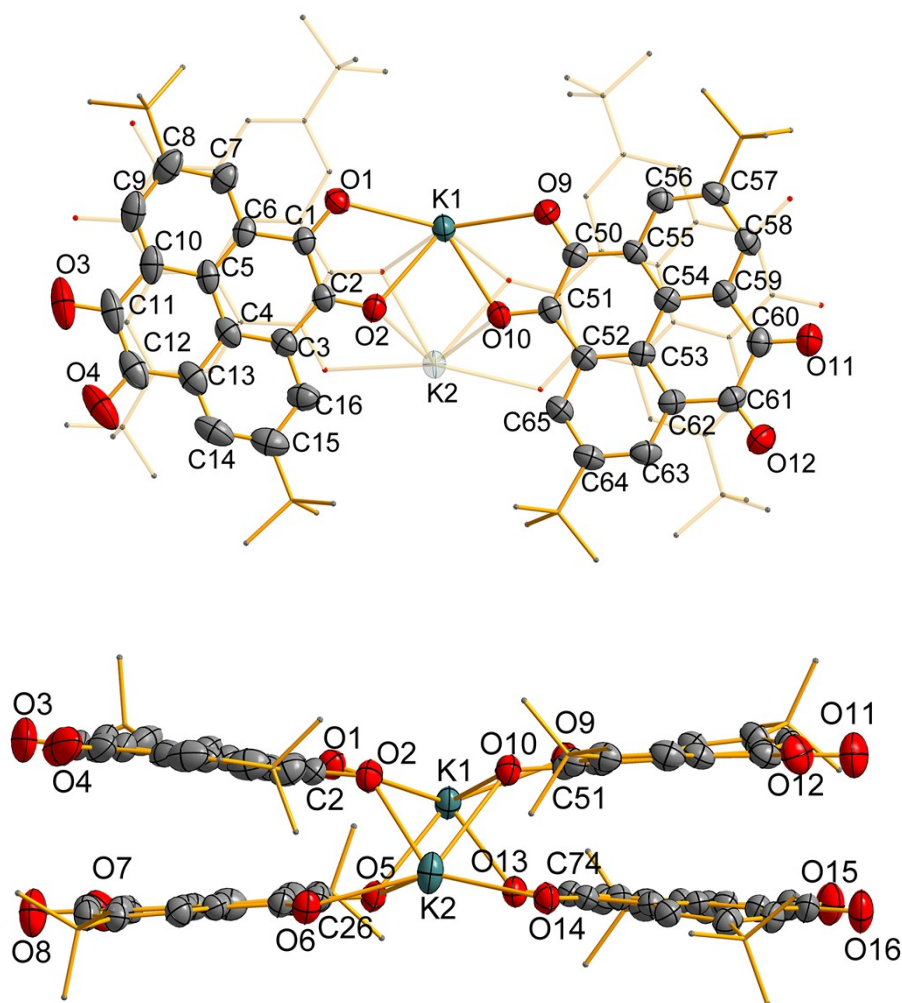

**Fig. S3** Thermal ellipsoid drawing of the molecular structures of  $(1_4K_2)^{2-}$  dianion in  $[1K(15c5)]_4$  at 50% probability (up: topview; down: side view). Two  $(15c5)_2K^+$  cations, solvent molecules and hydrogen atoms are omitted for clarity. Selected bond lengths ( $\text{\AA}$ ) and angles ( $^\circ$ ): C1–O1 1.256(4), C2–O2 1.260(4), C11–O3 1.219(4), C12–O4 1.223(5), C1–C2 1.457(4), C11–C12 1.515(7), C4–C5 1.438(5), C50–O9 1.255(4), C51–O10 1.256(3), C60–O11 1.218(4), C61–O12 1.220(4), C50–C51 1.464(4), C60–C61 1.534(5), C53–C54 1.449(4), K1–O1 2.760(2), K1–O2 2.670(2), K1–O9 2.749(2), K1–O10 2.692(2), C1–C6 1.480(4), C2–C3 1.462(4), C3–C4 1.391(5), C3–C16 1.404(5), C4–C13 1.428(5), C5–C6 1.409(5), C5–C10 1.409(5), C10–C11 1.482(6), C12–C13 1.451(6); C50–C55 1.479(4), C51–C52 1.460(4), C52–C65 1.395(4), C52–C53 1.415(4), C53–C62 1.402(4), C54–C55 1.402(4), C54–C59 1.412(4), C59–C60 1.458(5), C61–C62 1.464(5); O1–C1–C2 121.3(3), O1–C1–C6 121.2(3), O2–C2–C1 120.3(3), O2–C2–C3 120.1(3), O9–C50–C51 121.3(3), O9–C50–C55 120.9(3).

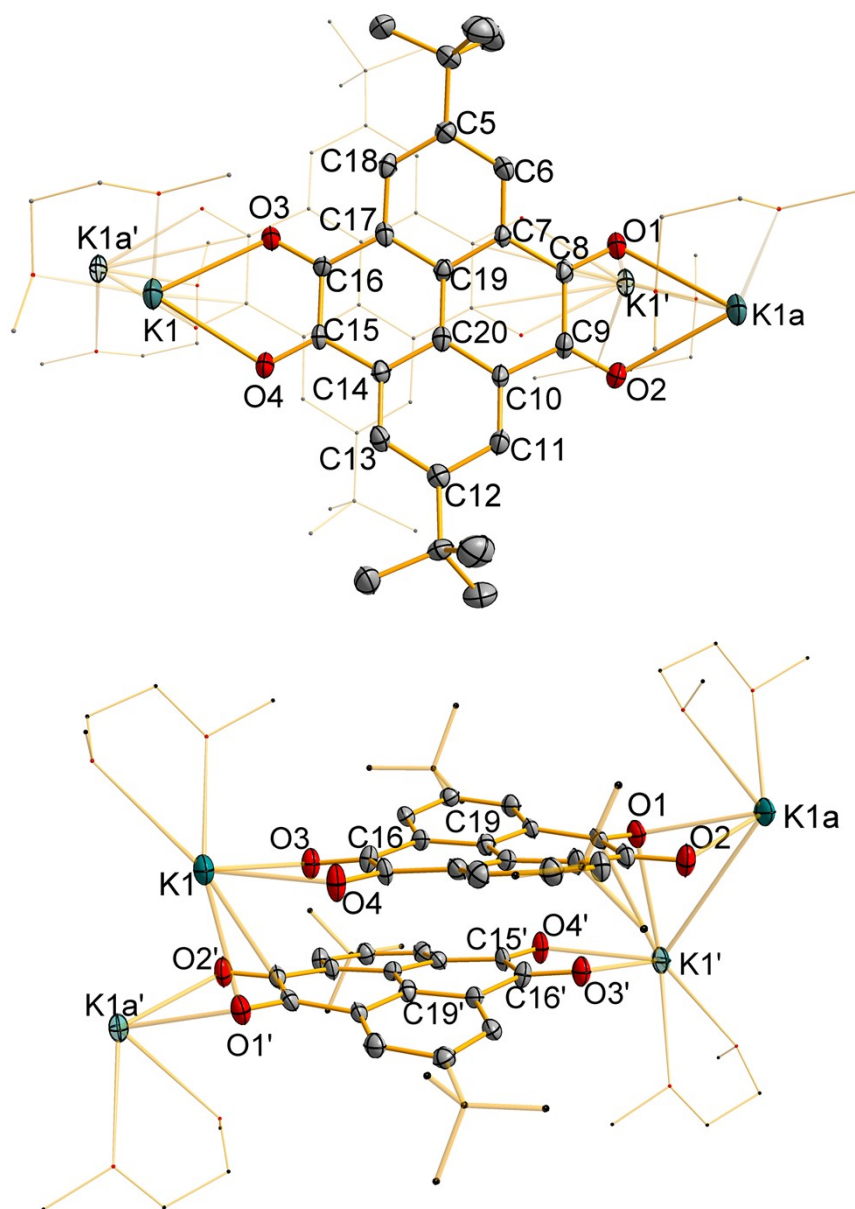

**Fig. S4** Thermal ellipsoid drawing of the molecular structures of one unit in **(1K)<sub>2n</sub>** at 50% probability (up: topview; down: side view). Two neighboring K atoms and two DME molecules were added, and hydrogen atoms are omitted for clarity. Selected bond lengths (Å) and angles (°): C8-O1 1.240(6), C9-O2 1.221(6), O3-C16 1.260(6), O4-C15 1.247(6), K1-O3 2.698(4), K1-O4 2.728(4), K1''-O2 2.751(4), K1''-O1 2.788(4), C8-C9 1.531(8), C15-C16 1.480(7), C14-C15 1.468(7), C5-C18 1.375(7), C5-C6 1.407(7), C6-C7 1.384(7), C7-C19 1.412(7), C7-C8 1.473(7), C9-C10 1.480(7), C10-C11 1.382(7), C10-C20 1.414(7), C11-C12 1.419(8), C12-C13 1.398(8), C12-C21 1.521(7), C13-C14 1.400(7), C14-C20 1.410(7), C16-C17 1.450(7), C17-C18 1.415(7), C17-C19 1.423(7), C19-C20 1.433(7); O1-C8-C7 123.5(5), O1-C8-C9 118.2(5), O2-C9-C10 123.5(5), O2-C9-C8 119.0(5), O4-C15-C14 121.6(5), O4-C15-C16 119.6(5), O3-C16-C17 122.8(5), O3-C16-C15 119.2(4).



## 5. EPR and SQUID measurements

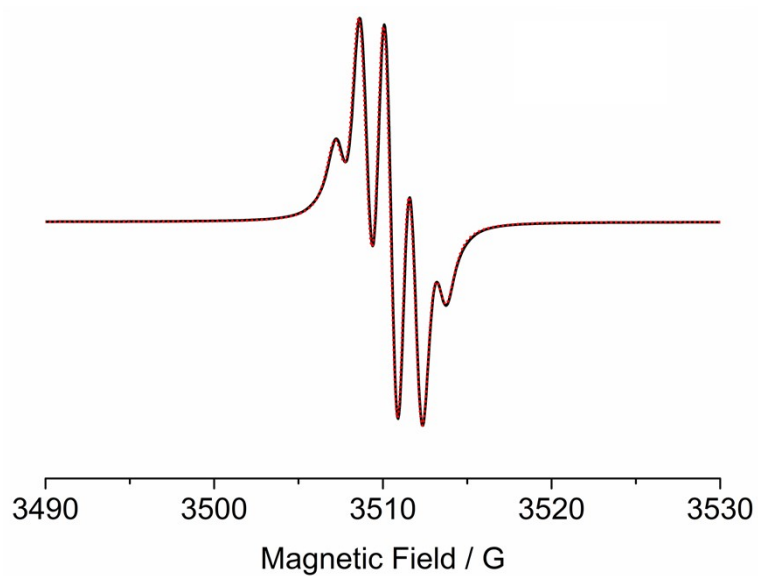

**Fig. S5** Experimental (black line) and simulated (red dotted line) EPR spectra of **1K(cryp)** in THF solution at room temperature.

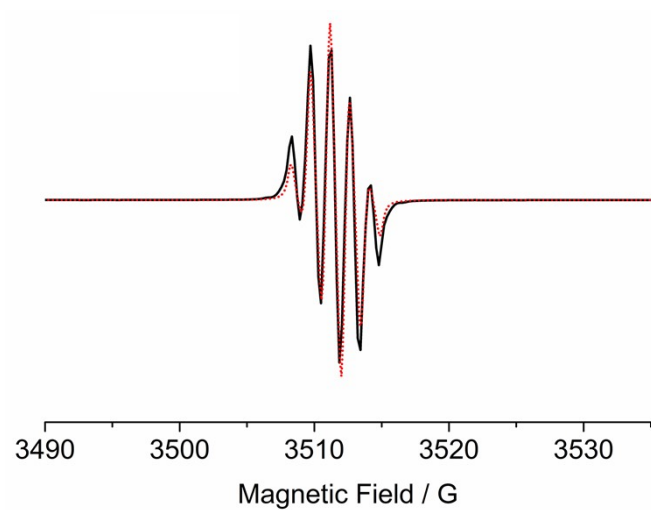

**Fig. S6** Experimental (black line) and simulated (red dotted line) EPR spectra of **1K(18c6)** in THF solution at room temperature.

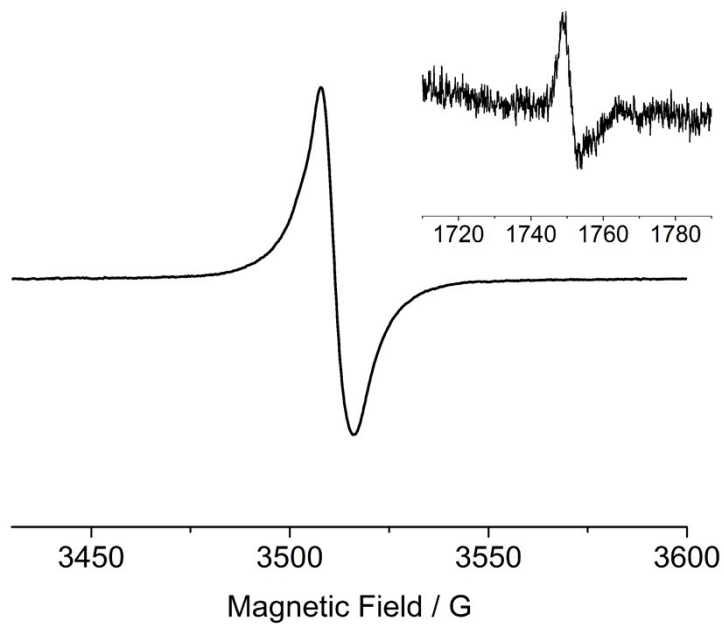

**Fig. S7** EPR spectrum of  $[1\mathbf{K}(15\mathbf{c5})]_4$  in powder at room temperature with inset showing the half-field signal.

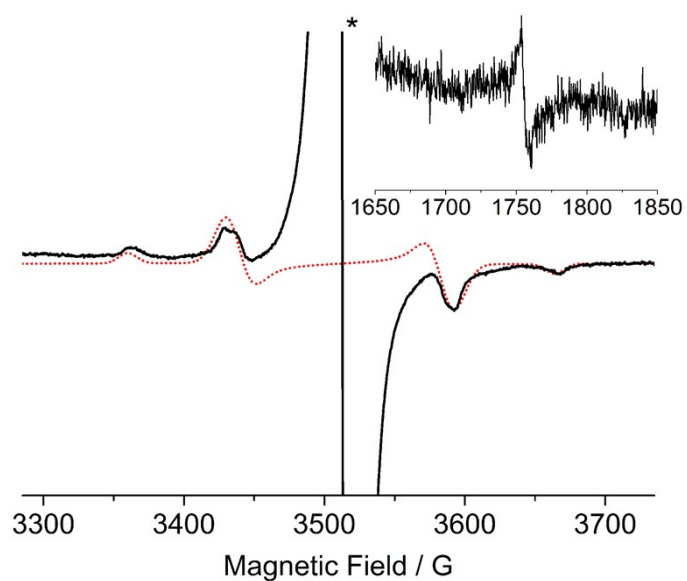

**Fig. S8** EPR spectrum (black line) of  $(1\mathbf{K})_{2n}$  in powder at room temperature with simulation (red dotted line) with inset showing the half-field signal. The central signals labelled with star belongs to the monoradical.

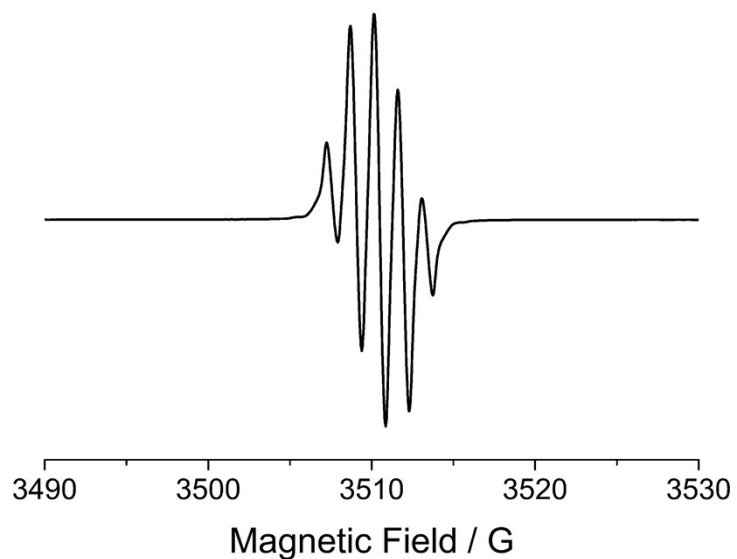

**Fig. S9** EPR spectrum of  $[1K(15c5)]_4$  in THF solution at room temperature.

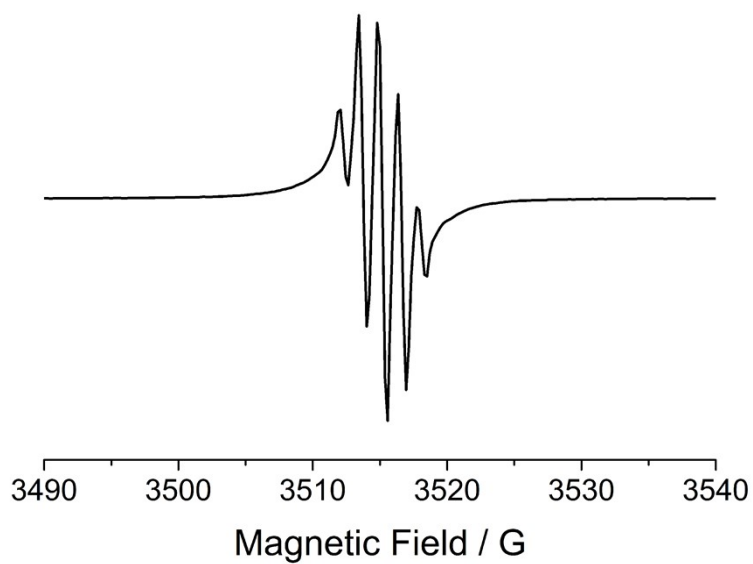

**Fig. S10** EPR spectrum of  $(1K)_{2n}$  in THF solution at room temperature.

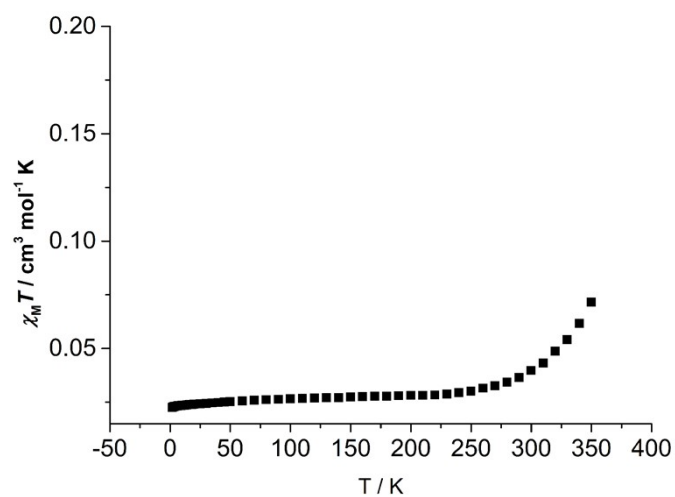

**Fig. S11** SQUID measurement of **(1K)<sub>2n</sub>** in powder.

## 6. UV Spectra

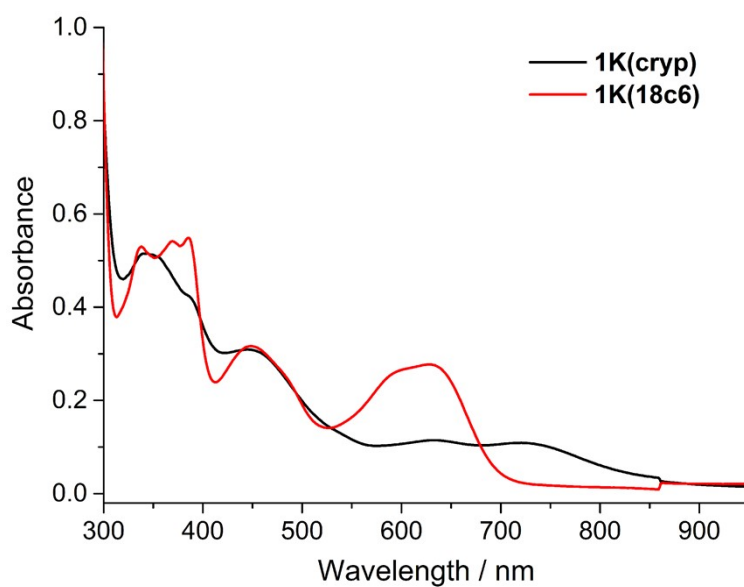

**Fig. S12** UV-vis spectra of **1K(cryp)** and **1K(18c6)** in THF solution at room temperature.

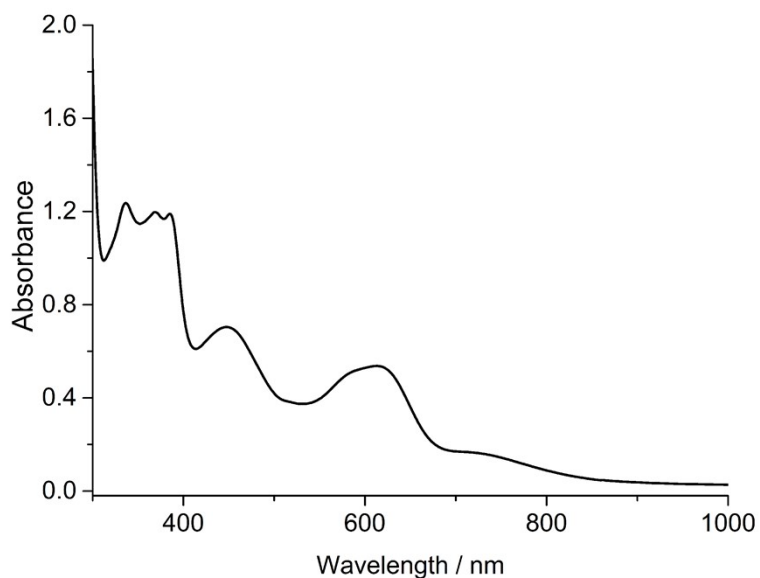

**Fig. S13** UV-vis spectra of  $[1\mathbf{K}(15\mathbf{c}5)]_4$  in THF solution at room temperature.

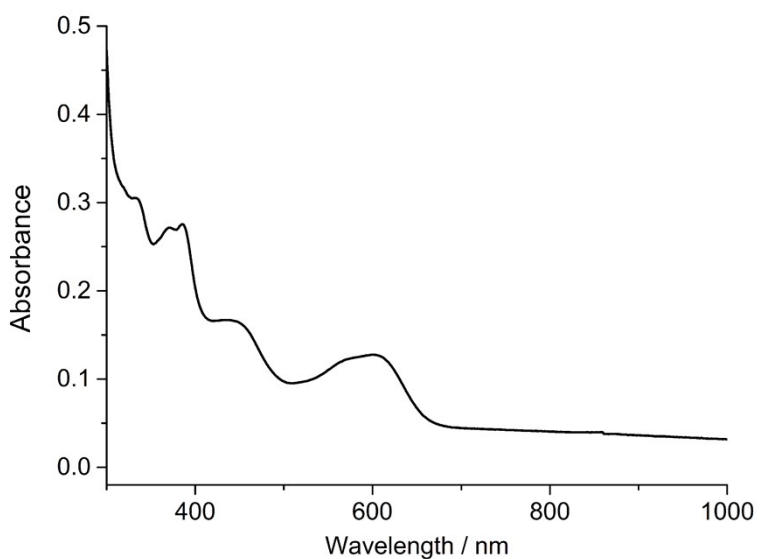

**Fig. S14** UV-vis spectra of  $(1\mathbf{K})_{2n}$  in THF solution at room temperature.

The EPR spectra of  $[1\mathbf{K}(15\mathbf{c}5)]_4$  and  $(1\mathbf{K})_{2n}$  in THF solution at ambient temperature (Fig. S9 and S10) both show monoradical signals ( $g = 2.00491$  G,  $a(^1\text{H}) = 1.44$  G for  $[1\mathbf{K}(15\mathbf{c}5)]_4$ ;  $g = 2.00486$ ,  $a(^1\text{H}) = 1.44$  G for  $(1\mathbf{K})_{2n}$ ), and diradical signals were not observed. Consequently, we believe that both  $[1\mathbf{K}(15\mathbf{c}5)]_4$  and  $(1\mathbf{K})_{2n}$  depolymerize in THF solution at room temperature.

Then, we speculate that PTO moieties of  $(\mathbf{1K})_{2n}$  remain coordinate to  $K^+$  cation in THF solution, just like  $\mathbf{1K}(\mathbf{18c6})$ . So its UV-vis spectrum in THF solution is similar to that of  $\mathbf{1K}(\mathbf{18c6})$ .

While, in the THF solution of  $[\mathbf{1K}(\mathbf{15c5})]_4$ , two K atoms are surrounded by coordinated four 15-crown-5, and there are not enough naked  $K^+$  cations to be coordinated by all the four PTO moieties. Then part of the PTO moieties exist either in the form of  $\mathbf{1}^-$ , or in a coordinated form between  $\mathbf{1}^-$  and  $\mathbf{1K}(\mathbf{18c6})$ . That may be the reason why both  $\mathbf{1K}(\mathbf{cryp})$  and  $[\mathbf{1K}(\mathbf{15c5})]_4$  exhibit absorption bands of 700-800 nm.

## 7. Computation details

All calculations were performed with the Gaussian 09 program suite.<sup>3,4</sup> The geometry optimizations of  $\mathbf{1K}(\mathbf{cryp})$  and  $\mathbf{1K}(\mathbf{18c6})$  were carried out at the UB3LYP/6-31G\* levels of theory. The obtained stationary points were characterized by frequency calculations. The frontier molecular orbitals and spin densities were calculated at the level of UB3LYP/6-31G\* on the optimized geometries and no imaginary frequency was found, which confirmed the local minimum of the optimized structures. The UV-vis absorption spectra were calculated using the time-dependent DFT (TD-DFT) method at UCAM-B3LYP/6-31+G(d) level on  $\mathbf{1}^-$  and  $\mathbf{1K}(\mathbf{18c6})$ .

**Table S2.** Comparison of selected experimental and calculated bond lengths for  $\mathbf{1}^-$  in  $\mathbf{1K}(\mathbf{cryp})$ .

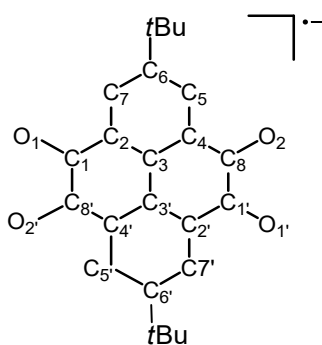

| Bond   | X-ray    | Cal.  | Bond   | X-ray    | Cal.  |
|--------|----------|-------|--------|----------|-------|
| O1–C1  | 1.238(3) | 1.238 | C4–C8  | 1.470(3) | 1.480 |
| O2–C8  | 1.229(3) | 1.238 | C3–C3' | 1.443(3) | 1.429 |
| C1–C8' | 1.490(3) | 1.521 | C4–C5  | 1.395(3) | 1.396 |
| C1–C2  | 1.469(3) | 1.477 | C5–C6  | 1.396(4) | 1.405 |
| C2–C3  | 1.410(3) | 1.423 | C6–C7  | 1.384(3) | 1.399 |
| C3–C4  | 1.411(3) | 1.425 | C2–C7  | 1.395(3) | 1.402 |

**Table S3.** Comparison of selected experimental and calculated bond lengths for **1K(18c6)**.

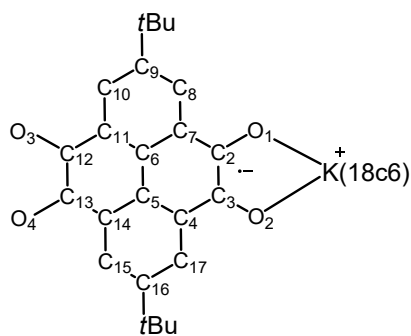

| Bond    | X-ray    | Cal.  | Bond    | X-ray    | Cal.  |
|---------|----------|-------|---------|----------|-------|
| C2–O1   | 1.253(5) | 1.269 | C5–C14  | 1.406(5) | 1.414 |
| C3–O2   | 1.263(5) | 1.269 | C6–C11  | 1.408(5) | 1.414 |
| C2–C3   | 1.458(6) | 1.468 | C11–C12 | 1.491(6) | 1.481 |
| C12–O3  | 1.202(5) | 1.221 | C13–C14 | 1.474(5) | 1.481 |
| C13–O4  | 1.218(5) | 1.221 | C4–C17  | 1.410(5) | 1.406 |
| C12–C13 | 1.534(6) | 1.553 | K1–O1   | 2.847(3) | 2.691 |
| C2–C7   | 1.478(5) | 1.470 | K1–O2   | 2.668(3) | 2.691 |
| C3–C4   | 1.459(5) | 1.470 | C7–C8   | 1.409(5) | 1.406 |
| C4–C5   | 1.406(5) | 1.417 | C8–C9   | 1.388(6) | 1.397 |
| C5–C6   | 1.455(5) | 1.450 | C9–C10  | 1.388(6) | 1.403 |
| C6–C7   | 1.414(5) | 1.417 | C10–C11 | 1.386(6) | 1.397 |

**Table S4.** Calculated excited wavelengths ( $\lambda$ ) and oscillator strengths ( $f$ ) of selected transitions of **1<sup>-</sup>** (in **1K(cryp)**) and **1K(18c6)**.

| Compound             | Excited state  | Wavelength/nm | $f$    | Transition nature                   |     |
|----------------------|----------------|---------------|--------|-------------------------------------|-----|
| <b>1<sup>-</sup></b> | S <sub>1</sub> | 801.9         | 0.2205 | HOMO( $\alpha$ )→LUMO+1( $\alpha$ ) | 97% |
|                      | S <sub>2</sub> | 727.0         | 0.0054 | HOMO-1( $\alpha$ )→LUMO( $\alpha$ ) | 74% |
|                      |                |               |        | HOMO( $\beta$ )→LUMO( $\beta$ )     | 16% |
| <b>1K(18c6)</b>      | S <sub>1</sub> | 594.2         | 0.0211 | HOMO-1( $\alpha$ )→LUMO( $\alpha$ ) | 27% |
|                      |                |               |        | HOMO( $\alpha$ )→LUMO+1( $\alpha$ ) | 15% |
|                      |                |               |        | HOMO-2( $\beta$ )→LUMO( $\beta$ )   | 12% |
|                      |                |               |        | HOMO( $\beta$ )→LUMO( $\beta$ )     | 22% |
|                      | S <sub>2</sub> | 487.8         | 0.0478 | HOMO( $\alpha$ )→LUMO+1( $\alpha$ ) | 64% |

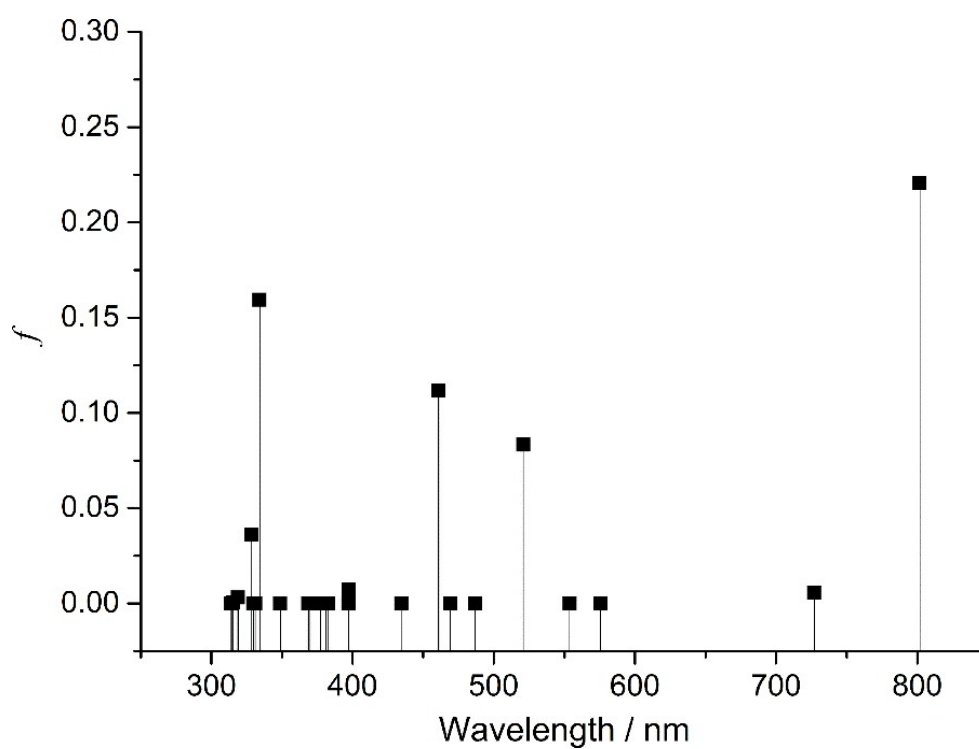

**Fig. S15** Calculated UV/vis absorption spectra of  $1^-$ .



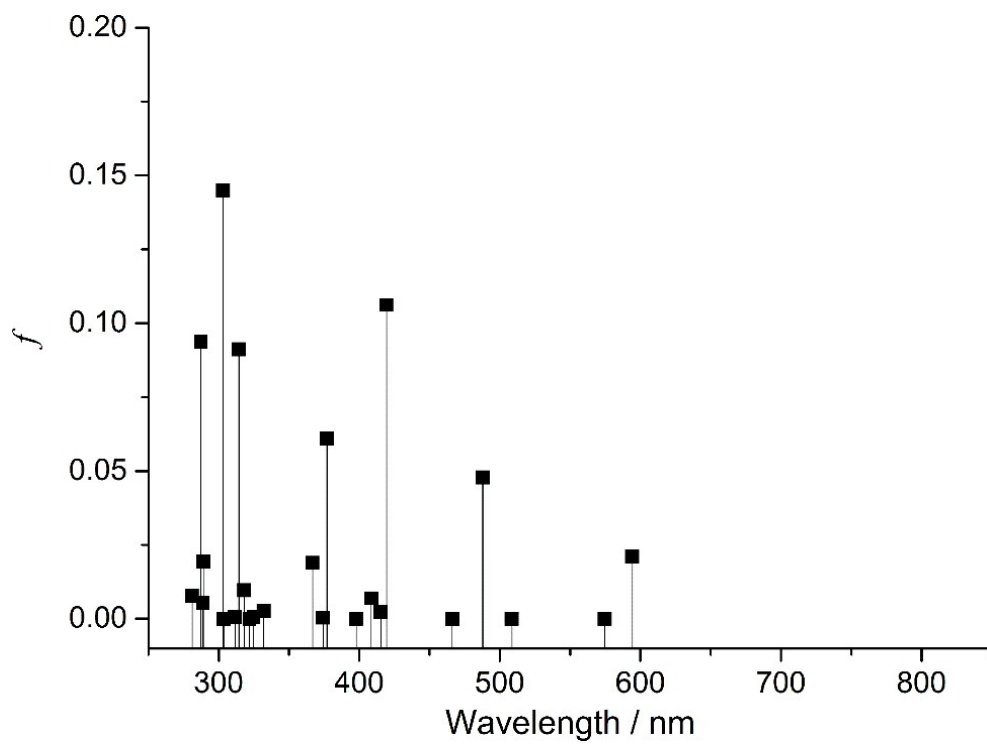

**Fig. S16** Calculated UV/vis absorption spectra of **1K(18c6)**.

**Table S5.** Main frontier molecular orbitals related to UV/vis absorption transitions of **1<sup>-</sup>** and **1K(18c6)**.

|                  | <b>1<sup>-</sup></b>                                                                | <b>1K(18c6)</b>                                                                      |
|------------------|-------------------------------------------------------------------------------------|--------------------------------------------------------------------------------------|
| HOMO( $\alpha$ ) | 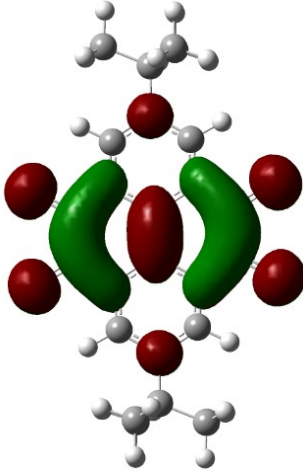   |    |
| HOMO( $\beta$ )  |  |  |

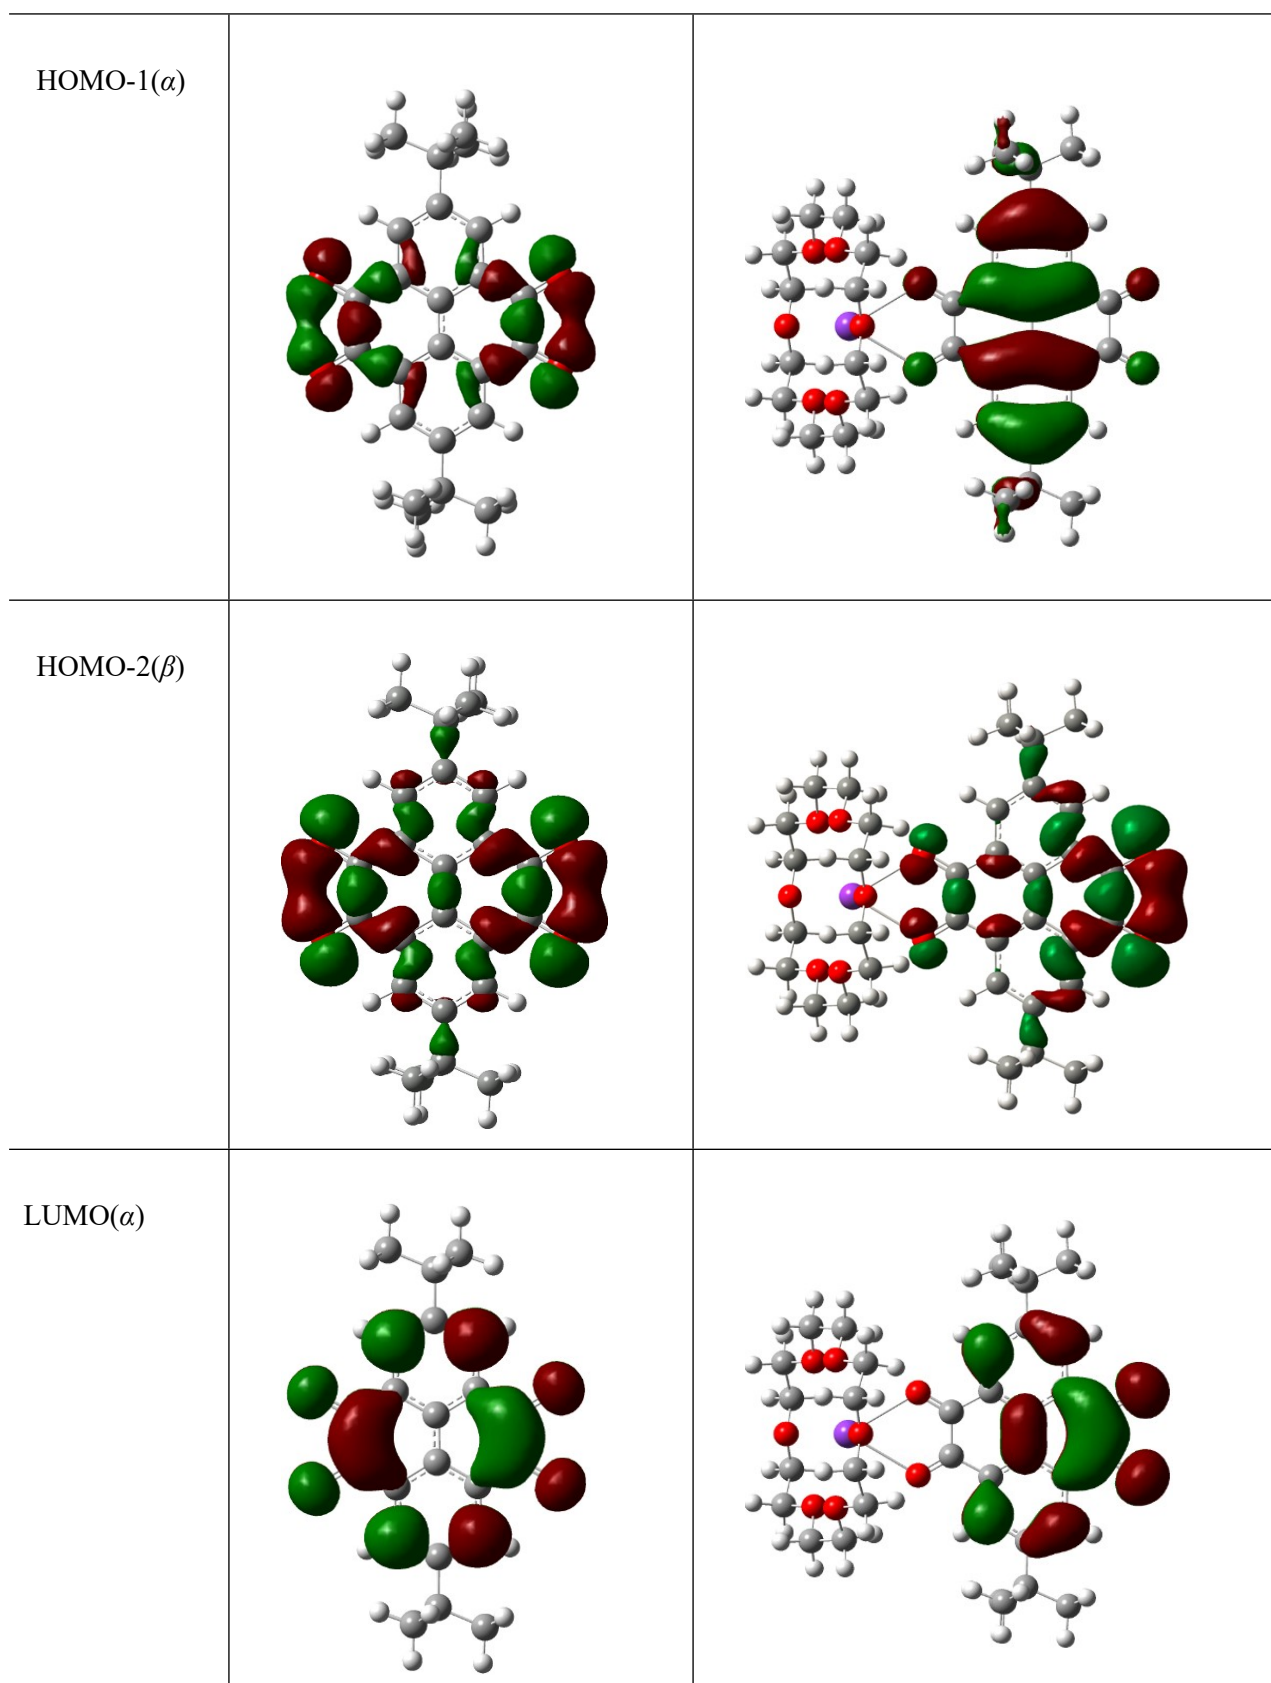

LUMO( $\beta$ )

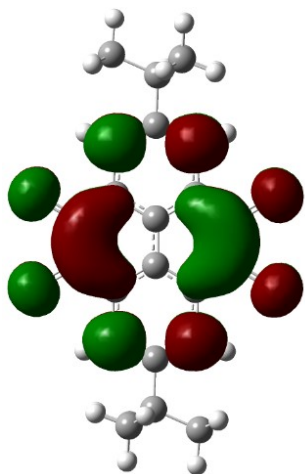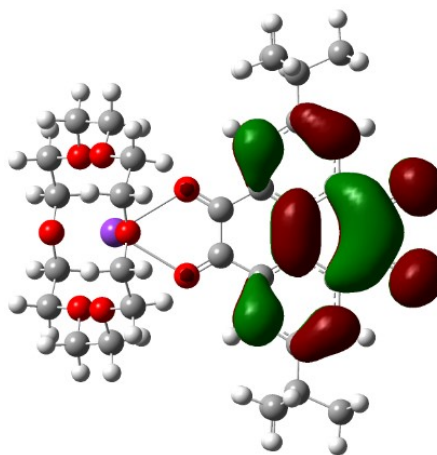

LUMO+1( $\alpha$ )

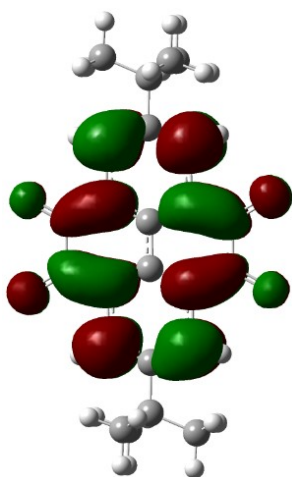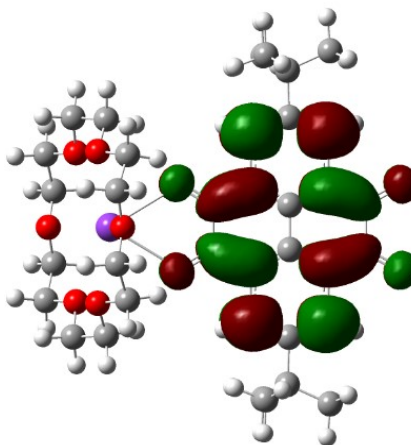

## Coordinates of the studied molecules

1<sup>-</sup>

| Center<br>Number | Atomic<br>Number | Atomic<br>Type | Coordinates (Angstroms) |           |           |
|------------------|------------------|----------------|-------------------------|-----------|-----------|
|                  |                  |                | X                       | Y         | Z         |
| 1                | 8                | 0              | -1.417970               | 3.591586  | -0.000302 |
| 2                | 8                | 0              | -1.343085               | -3.621486 | -0.000296 |
| 3                | 6                | 0              | -0.786248               | 2.527280  | -0.000037 |
| 4                | 6                | 0              | -1.456423               | 1.208032  | 0.000028  |
| 5                | 6                | 0              | -2.851911               | 1.164300  | 0.000166  |
| 6                | 1                | 0              | -3.358766               | 2.125627  | 0.000004  |
| 7                | 6                | 0              | -3.573358               | -0.041045 | 0.000308  |
| 8                | 6                | 0              | -2.831352               | -1.227457 | 0.000120  |
| 9                | 1                | 0              | -3.311628               | -2.199801 | -0.000021 |
| 10               | 6                | 0              | -1.429888               | -1.239061 | -0.000007 |
| 11               | 6                | 0              | -0.714353               | -0.008902 | 0.000006  |
| 12               | 6                | 0              | -0.734839               | -2.542672 | -0.000172 |
| 13               | 6                | 0              | -5.112966               | -0.014170 | 0.000076  |
| 14               | 6                | 0              | -5.722351               | -1.429002 | 0.000484  |
| 15               | 1                | 0              | -5.422782               | -2.000599 | 0.886008  |
| 16               | 1                | 0              | -5.423597               | -2.000761 | -0.885234 |
| 17               | 1                | 0              | -6.817322               | -1.360545 | 0.000978  |
| 18               | 6                | 0              | -5.617503               | 0.726445  | -1.260904 |
| 19               | 1                | 0              | -5.285051               | 0.214321  | -2.171353 |
| 20               | 1                | 0              | -5.243254               | 1.754557  | -1.302356 |
| 21               | 1                | 0              | -6.715121               | 0.766929  | -1.273441 |
| 22               | 6                | 0              | -5.618098               | 0.727529  | 1.260196  |
| 23               | 1                | 0              | -6.715511               | 0.773148  | 1.269221  |
| 24               | 1                | 0              | -5.239100               | 1.753781  | 1.303975  |
| 25               | 1                | 0              | -5.290972               | 0.212944  | 2.171196  |
| 26               | 8                | 0              | 1.417968                | -3.591584 | 0.000258  |
| 27               | 8                | 0              | 1.343083                | 3.621490  | 0.000331  |
| 28               | 6                | 0              | 0.786246                | -2.527278 | 0.000265  |
| 29               | 6                | 0              | 1.456422                | -1.208030 | 0.000053  |
| 30               | 6                | 0              | 2.851910                | -1.164299 | -0.000087 |
| 31               | 1                | 0              | 3.358765                | -2.125626 | 0.000166  |
| 32               | 6                | 0              | 3.573358                | 0.041045  | -0.000314 |
| 33               | 6                | 0              | 2.831353                | 1.227458  | -0.000210 |
| 34               | 1                | 0              | 3.311631                | 2.199802  | -0.000141 |
| 35               | 6                | 0              | 1.429890                | 1.239064  | -0.000099 |
| 36               | 6                | 0              | 0.714354                | 0.008906  | -0.000023 |
| 37               | 6                | 0              | 0.734840                | 2.542675  | -0.000083 |
| 38               | 6                | 0              | 5.112967                | 0.014168  | -0.000064 |
| 39               | 6                | 0              | 5.722355                | 1.428997  | -0.000558 |
| 40               | 1                | 0              | 5.422784                | 2.000543  | -0.886114 |
| 41               | 1                | 0              | 5.423607                | 2.000810  | 0.885128  |
| 42               | 1                | 0              | 6.817325                | 1.360537  | -0.001054 |
| 43               | 6                | 0              | 5.617489                | -0.726367 | 1.260969  |
| 44               | 1                | 0              | 5.285025                | -0.214186 | 2.171381  |
| 45               | 1                | 0              | 5.243242                | -1.754477 | 1.302481  |
| 46               | 1                | 0              | 6.715107                | -0.766848 | 1.273520  |
| 47               | 6                | 0              | 5.618109                | -0.727615 | -1.260131 |
| 48               | 1                | 0              | 6.715522                | -0.773248 | -1.269137 |
| 49               | 1                | 0              | 5.239099                | -1.753866 | -1.303852 |
| 50               | 1                | 0              | 5.291003                | -0.213083 | -2.171168 |

1K(18c6)

| Center<br>Number | Atomic<br>Number | Atomic<br>Type | Coordinates (Angstroms) |           |           |
|------------------|------------------|----------------|-------------------------|-----------|-----------|
|                  |                  |                | X                       | Y         | Z         |
| 1                | 6                | 0              | 0.477164                | 0.734047  | -0.114152 |
| 2                | 6                | 0              | 0.477211                | -0.733917 | -0.114145 |
| 3                | 6                | 0              | 1.770139                | -1.432321 | -0.162342 |
| 4                | 6                | 0              | 2.997910                | -0.724979 | -0.199833 |
| 5                | 6                | 0              | 2.997865                | 0.725267  | -0.199866 |
| 6                | 6                | 0              | 1.770048                | 1.432529  | -0.162383 |
| 7                | 6                | 0              | 1.791450                | 2.838573  | -0.173366 |
| 8                | 1                | 0              | 0.824374                | 3.330118  | -0.149509 |
| 9                | 6                | 0              | 2.973308                | 3.582620  | -0.217357 |
| 10               | 6                | 0              | 4.179050                | 2.865483  | -0.248443 |
| 11               | 1                | 0              | 5.138782                | 3.367049  | -0.282092 |
| 12               | 6                | 0              | 4.199678                | 1.468709  | -0.240587 |
| 13               | 6                | 0              | 5.509132                | 0.776974  | -0.277618 |
| 14               | 6                | 0              | 5.509188                | -0.776515 | -0.277418 |
| 15               | 6                | 0              | 4.199774                | -1.468341 | -0.240466 |
| 16               | 6                | 0              | 4.179246                | -2.865115 | -0.248270 |
| 17               | 1                | 0              | 5.139017                | -3.366614 | -0.281806 |
| 18               | 6                | 0              | 2.973552                | -3.582333 | -0.217237 |
| 19               | 6                | 0              | 1.791642                | -2.838365 | -0.173294 |
| 20               | 1                | 0              | 0.824605                | -3.329988 | -0.149442 |
| 21               | 6                | 0              | 2.918165                | 5.121596  | -0.231813 |
| 22               | 6                | 0              | 2.210798                | 5.623171  | 1.049301  |
| 23               | 1                | 0              | 2.757988                | 5.310754  | 1.946122  |
| 24               | 1                | 0              | 1.190158                | 5.233727  | 1.127754  |
| 25               | 1                | 0              | 2.152984                | 6.718892  | 1.051038  |
| 26               | 6                | 0              | 2.125024                | 5.595789  | -1.472557 |
| 27               | 1                | 0              | 2.064779                | 6.691176  | -1.492784 |
| 28               | 1                | 0              | 1.102419                | 5.203493  | -1.475128 |
| 29               | 1                | 0              | 2.611377                | 5.265321  | -2.397416 |
| 30               | 6                | 0              | 4.320884                | 5.756067  | -0.285803 |
| 31               | 1                | 0              | 4.231229                | 6.848426  | -0.295692 |
| 32               | 1                | 0              | 4.867976                | 5.460104  | -1.187849 |
| 33               | 1                | 0              | 4.927403                | 5.481318  | 0.584461  |
| 34               | 6                | 0              | 2.918501                | -5.121320 | -0.231745 |
| 35               | 6                | 0              | 4.321269                | -5.755727 | -0.285244 |
| 36               | 1                | 0              | 4.231666                | -6.848091 | -0.295150 |
| 37               | 1                | 0              | 4.927477                | -5.480926 | 0.585224  |
| 38               | 1                | 0              | 4.868667                | -5.459768 | -1.187105 |
| 39               | 6                | 0              | 2.125836                | -5.595481 | -1.472811 |
| 40               | 1                | 0              | 1.103282                | -5.203059 | -1.475809 |
| 41               | 1                | 0              | 2.065487                | -6.690866 | -1.493041 |
| 42               | 1                | 0              | 2.612612                | -5.265084 | -2.397472 |
| 43               | 6                | 0              | 2.210694                | -5.623015 | 1.049068  |
| 44               | 1                | 0              | 1.189965                | -5.233727 | 1.127131  |
| 45               | 1                | 0              | 2.757479                | -5.310548 | 1.946118  |
| 46               | 1                | 0              | 2.153027                | -6.718740 | 1.050748  |
| 47               | 6                | 0              | -3.043779               | 3.526649  | 0.772535  |
| 48               | 1                | 0              | -2.070122               | 3.355915  | 0.293760  |
| 49               | 1                | 0              | -3.018821               | 4.494485  | 1.301162  |
| 50               | 6                | 0              | -4.137516               | 3.575988  | -0.273109 |
| 51               | 1                | 0              | -5.123941               | 3.609152  | 0.216285  |
| 52               | 1                | 0              | -4.021709               | 4.492980  | -0.873786 |
| 53               | 6                | 0              | -5.033527               | 2.383509  | -2.113046 |
| 54               | 1                | 0              | -5.004577               | 3.296225  | -2.731103 |
| 55               | 1                | 0              | -6.036677               | 2.308188  | -1.663263 |
| 56               | 6                | 0              | -4.776238               | 1.184378  | -3.001440 |
| 57               | 1                | 0              | -5.482162               | 1.205040  | -3.847939 |

|    |    |   |           |           |           |
|----|----|---|-----------|-----------|-----------|
| 58 | 1  | 0 | -3.753450 | 1.234691  | -3.407277 |
| 59 | 6  | 0 | -4.776506 | -1.183184 | -3.002128 |
| 60 | 1  | 0 | -5.482819 | -1.203462 | -3.848310 |
| 61 | 1  | 0 | -3.753909 | -1.233221 | -3.408463 |
| 62 | 6  | 0 | -5.033362 | -2.382804 | -2.114256 |
| 63 | 1  | 0 | -6.036578 | -2.308131 | -1.664505 |
| 64 | 1  | 0 | -5.003978 | -3.295225 | -2.732732 |
| 65 | 6  | 0 | -4.136777 | -3.576048 | -0.275143 |
| 66 | 1  | 0 | -4.020469 | -4.492486 | -0.876547 |
| 67 | 1  | 0 | -5.123187 | -3.610121 | 0.214201  |
| 68 | 6  | 0 | -2.343226 | -2.372144 | 2.708987  |
| 69 | 1  | 0 | -1.350969 | -2.229448 | 2.260039  |
| 70 | 1  | 0 | -2.330980 | -3.290196 | 3.319989  |
| 71 | 6  | 0 | -2.678730 | -1.192063 | 3.597894  |
| 72 | 1  | 0 | -3.715587 | -1.272302 | 3.962758  |
| 73 | 1  | 0 | -2.006589 | -1.200216 | 4.471681  |
| 74 | 6  | 0 | -2.678602 | 1.190044  | 3.598404  |
| 75 | 1  | 0 | -2.006307 | 1.197840  | 4.472078  |
| 76 | 1  | 0 | -3.715394 | 1.270135  | 3.963482  |
| 77 | 6  | 0 | -2.343252 | 2.370496  | 2.709933  |
| 78 | 1  | 0 | -2.330872 | 3.288282  | 3.321331  |
| 79 | 1  | 0 | -1.351079 | 2.227991  | 2.260729  |
| 80 | 6  | 0 | -3.043081 | -3.526990 | 0.770554  |
| 81 | 1  | 0 | -3.017713 | -4.495236 | 1.298424  |
| 82 | 1  | 0 | -2.069481 | -3.355464 | 0.291952  |
| 83 | 19 | 0 | -2.916346 | -0.000134 | 0.057302  |
| 84 | 8  | 0 | -0.612324 | 1.384070  | -0.072583 |
| 85 | 8  | 0 | -0.612244 | -1.383999 | -0.072597 |
| 86 | 8  | 0 | 6.578269  | 1.364931  | -0.308419 |
| 87 | 8  | 0 | 6.578371  | -1.364406 | -0.307856 |
| 88 | 8  | 0 | -3.327472 | 2.475025  | 1.687673  |
| 89 | 8  | 0 | -4.039636 | 2.431290  | -1.107675 |
| 90 | 8  | 0 | -4.950466 | 0.000385  | -2.239262 |
| 91 | 8  | 0 | -4.039528 | -2.430633 | -1.108826 |
| 92 | 8  | 0 | -3.327255 | -2.476204 | 1.686500  |
| 93 | 8  | 0 | -2.503016 | -0.000859 | 2.852319  |

---

## References

- 1 J. Hu, D. Zhang, F. W. Harris, *J. Org. Chem.*, 2005, **70**, 707-708.
- 2 G. Sheldrick, *Acta Cryst. C*, 2015, **71**, 3-8.
- 3 A. D. Becke, *J. Chem. Phys.*, 1993, **98**, 5648-5652.
- 4 M. J. Frisch, G. W. Trucks, H. B. Schlegel, G. E. Scuseria, M. A. Robb, J. R. Cheeseman, G. Scalmani, V. Barone, B. Mennucci, G. A. Petersson, H. Nakatsuji, M. Caricato, X. Li, H. P. Hratchian, A. F. Izmaylov, J. Bloino, G. Zheng, J. L. Sonnenberg, M. Hada, M. Ehara, K. Toyota, R. Fukuda, J. Hasegawa, M. Ishida, T. Nakajima, Y. Honda, O. Kitao, H. Nakai, T. Vreven, Jr. J. A. Montgomery, J. E. Peralta, F. Ogliaro, M. Bearpark, J. J. Heyd, E. Brothers, K. N. Kudin, V. N. Staroverov, T. Kieth, R. Kobayashi, J. Normand, K. Raghavachari, A. Rendell, J. C. Burant, S. S. Iyengar, J. Tomasi, M. Cossi, N. Rega, N. J. Millam, M. Klene, J. E. Knox, J. B. Cross, V. Bakken, C. Adamo, J. Jaramillo, R. Gomperts, R. E. Stratmann, O. Yazyev, A. J. Austin, R. Cammi, C. Pomelli, J. W. Ochterski, R. L. Martin, K. Morokuma, V. G. Zakrzewski, G. A. Voth, P. Salvador, J. J. Dannenberg, S. Dapprich, A. D. Daniels, Ö. Farkas, J. B. Foresman, J. V. Ortiz, J. Cioslowski and D. J. Fox, in *Gaussian 09, Revision B.01*, Gaussian, Inc., Wallingford CT, 2010.
